# Supplementary material for: Synthesis, crystal structure, and ionic conductivity of tunnel structure phosphates, RbMg1−xH2x(PO3)3·y(H2O)
Source: Royal Society of Chemistry journal article supplement (doi:10.1039/c3ta13004e), 2013-01-01
Supplement: c3ta13004e.pdf [file c3ta13004e.pdf]

## Supporting Information

Yasuaki Matsuda,<sup>a</sup> Masao Yonemura,<sup>b</sup> Hikaru Koga,<sup>a</sup> Cedric Pitteloud,<sup>a</sup> Miki Nagao,<sup>b</sup> Masaaki Hirayama<sup>a</sup> and Ryoji

Kanno<sup>\*a</sup>

*a) Department of Electronic Chemistry, Interdisciplinary Graduate School of Science and Engineering, Tokyo Institute of Technology, 4259 Nagatsuta, Midori, Yokohama, Kanagawa 226-8502, Japan.*

*b) Institute of Materials Structure Science, High Energy Accelerator Research Organization (KEK), 203-1 Shirakata, Tokai, Ibaraki 319-1106, Japan.*

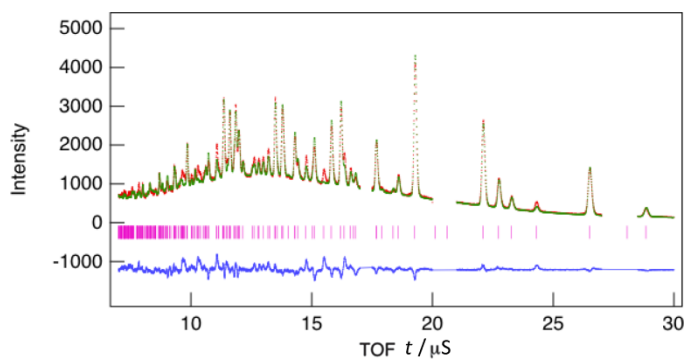

Fig. S1 Neutron Rietveld refinement patterns for  $\text{RbMg}_{0.9}\text{H}_{0.2}(\text{PO}_3)_3 \cdot y\text{H}_2\text{O}$  at 453 K.

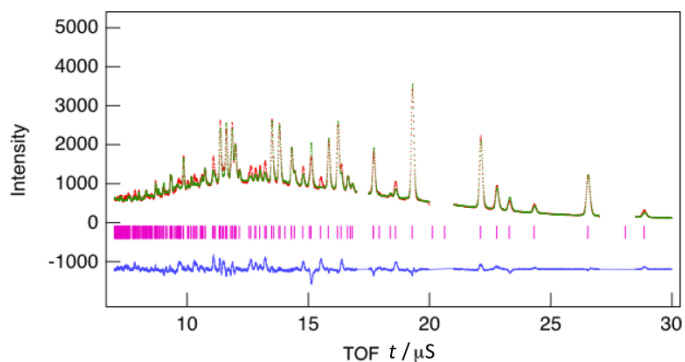

Fig. S2 Neutron Rietveld refinement patterns for  $\text{RbMg}_{0.9}\text{H}_{0.2}(\text{PO}_3)_3 \cdot y\text{H}_2\text{O}$  at 553 K.

Table S1. Crystallographic Data for  $\text{RbMg}_{0.9}\text{H}_{0.2}(\text{PO}_3)_3 \cdot y\text{H}_2\text{O}$  at 298 K.

|                 |                                                                              |
|-----------------|------------------------------------------------------------------------------|
| Formula sum     | $\text{RbMg}_{0.9}\text{H}_{0.2}(\text{PO}_3)_3 \cdot 1.4\text{H}_2\text{O}$ |
| Formula weight  | 371.48                                                                       |
| Crystal system  | Rhombohedral                                                                 |
| Space group     | $R\bar{3}2$                                                                  |
| Cell parameters | $a = 10.2402 \text{ \AA}$ , $c = 7.1762 \text{ \AA}$                         |
| $V$             | $651.69 \text{ \AA}^3$                                                       |
| $Z$             | 3                                                                            |
| Calc. density   | $2.861 \text{ g cm}^{-3}$                                                    |

Table S2 Rietveld refinement results for  $\text{RbMg}_{0.9}\text{H}_{0.2}(\text{PO}_3)_3 \cdot 1.4\text{H}_2\text{O}$  at 298 K.

| Atom | Site        | <i>g</i> | <i>x</i>    | <i>y</i>  | <i>z</i>  | <i>U</i> / Å <sup>2</sup> |
|------|-------------|----------|-------------|-----------|-----------|---------------------------|
| Mg   | 3 <i>a</i>  | 0.9      | 0           | 0         | 0         | 0.0073(7)                 |
| Rb   | 3 <i>b</i>  | 1        | 0           | 0         | 0.5       | 0.0079(7)                 |
| P    | 9 <i>e</i>  | 1        | 0.4329(2)   | 0         | 0.5       | 0.0126(7)                 |
| O(1) | 18 <i>f</i> | 1        | 0.1876(13)  | 0.0889(2) | 0.1670(4) | 0.0211(6)                 |
| O(2) | 9 <i>e</i>  | 1        | 0.3498(3)   | 0         | 0         | 0.0394(9)                 |
| O(3) | 18 <i>f</i> | 0.237(4) | 0.233(10)   | 0.2871(9) | 0.149(13) | 0.0335                    |
| H(1) | 18 <i>f</i> | 0.146(7) | 0.145(3)    | 0.238(3)  | 0.114(4)  | 0.044(8)                  |
| H(2) | 18 <i>f</i> | 0.279(6) | 0.779(15)   | 0.080(19) | 0.236(12) | 0.043(4)                  |
| H(3) | 9 <i>d</i>  | 0.41(10) | 0.777(1110) | 0         | 0         | 0.034(4)                  |

| Atom | <i>U</i> <sub>11</sub> / Å <sup>2</sup> | <i>U</i> <sub>33</sub> / Å <sup>2</sup> | <i>U</i> <sub>12</sub> / Å <sup>2</sup> | <i>U</i> <sub>13</sub> / Å <sup>2</sup> | <i>U</i> <sub>23</sub> / Å <sup>2</sup> | <i>U</i> <sub>22</sub> / Å <sup>2</sup> |
|------|-----------------------------------------|-----------------------------------------|-----------------------------------------|-----------------------------------------|-----------------------------------------|-----------------------------------------|
| O(3) | 0.014(4)                                | 0.029(7)                                | 0.063(10)                               | 0.014(4)                                | 0.007(5)                                | 0.0017(5)                               |

Space group *R*32, *a* = 10.2402(13) Å, *c* = 7.1762(15) Å, *R*<sub>w</sub>p = 6.90 %, *R*<sub>p</sub> = 4.77 %.

Table S3 Rietveld refinement results for  $\text{RbMg}_{0.9}\text{H}_{0.2}(\text{PO}_3)_3 \cdot 1.3\text{H}_2\text{O}$  at 453 K.

| Atom | Site        | <i>g</i> | <i>x</i>   | <i>y</i>  | <i>z</i>  | <i>U</i> / Å <sup>2</sup> |
|------|-------------|----------|------------|-----------|-----------|---------------------------|
| Mg   | 3 <i>a</i>  | 0.9      | 0          | 0         | 0         | 0.013(14)                 |
| Rb   | 3 <i>b</i>  | 1        | 0          | 0         | 0.5       | 0.013(12)                 |
| P    | 9 <i>e</i>  | 1        | 0.4324(4)  | 0         | 0.5       | 0.0154(9)                 |
| O(1) | 18 <i>f</i> | 1        | 0.18714(2) | 0.0879(3) | 0.1665(6) | 0.0260(7)                 |
| O(2) | 9 <i>e</i>  | 1        | 0.3486(4)  | 0         | 0         | 0.042(9)                  |
| O(3) | 18 <i>f</i> | 0.216(5) | 0.236(2)   | 0.287(18) | 0.150(2)  | 0.0436                    |
| H(1) | 18 <i>f</i> | 0.106(7) | 0.121(3)   | 0.211(3)  | 0.143(6)  | 0.046(9)                  |
| H(2) | 18 <i>f</i> | 0.204(6) | 0.765(3)   | 0.077(3)  | 0.223(2)  | 0.079(6)                  |
| H(3) | 9 <i>d</i>  | 0.40(13) | 0.779(19)  | 0         | 0         | 0.039(5)                  |

| Atom | <i>U</i> <sub>11</sub> / Å <sup>2</sup> | <i>U</i> <sub>22</sub> / Å <sup>2</sup> | <i>U</i> <sub>33</sub> / Å <sup>2</sup> | <i>U</i> <sub>12</sub> / Å <sup>2</sup> | <i>U</i> <sub>13</sub> / Å <sup>2</sup> | <i>U</i> <sub>23</sub> / Å <sup>2</sup> |
|------|-----------------------------------------|-----------------------------------------|-----------------------------------------|-----------------------------------------|-----------------------------------------|-----------------------------------------|
| O(3) | 0.021(5)                                | 0.027(8)                                | 0.08(10)                                | 0.014(6)                                | 0.008(7)                                | 0.005(7)                                |

Space group *R*32, *a* = 10.2532(18) Å, *c* = 7.1955(2) Å, *R*<sub>w</sub>p = 6.52 %, *R*<sub>p</sub> = 4.75 %.

Table S4 Rietveld refinement results for  $\text{RbMg}_{0.9}\text{H}_{0.2}(\text{PO}_3)_3 \cdot 1.0\text{H}_2\text{O}$  at 453 K.

| Atom | Site        | <i>g</i> | <i>x</i>  | <i>y</i>  | <i>z</i>  | <i>U</i> / Å <sup>2</sup> |
|------|-------------|----------|-----------|-----------|-----------|---------------------------|
| Mg   | 3 <i>a</i>  | 0.9      | 0         | 0         | 0         | 0.016(16)                 |
| Rb   | 3 <i>b</i>  | 1        | 0         | 0         | 0.5       | 0.015(14)                 |
| P    | 9 <i>e</i>  | 1        | 0.4336(4) | 0         | 0.5       | 0.017(12)                 |
| O(1) | 18 <i>f</i> | 1        | 0.1880(3) | 0.0904(3) | 0.1662(8) | 0.0302 (7)                |
| O(2) | 9 <i>e</i>  | 1        | 0.3475(4) | 0         | 0         | 0.052(13)                 |
| O(3) | 18 <i>f</i> | 0.171(4) | 0.249(3)  | 0.319(3)  | 0.138(3)  | 0.0694                    |
| H(2) | 18 <i>f</i> | 0.131(6) | 0.74(10)  | 0.083(8)  | 0.116(5)  | 0.13(10)                  |

| Atom | <i>U</i> <sub>11</sub> / Å <sup>2</sup> | <i>U</i> <sub>22</sub> / Å <sup>2</sup> | <i>U</i> <sub>33</sub> / Å <sup>2</sup> | <i>U</i> <sub>12</sub> / Å <sup>2</sup> | <i>U</i> <sub>13</sub> / Å <sup>2</sup> | <i>U</i> <sub>23</sub> / Å <sup>2</sup> |
|------|-----------------------------------------|-----------------------------------------|-----------------------------------------|-----------------------------------------|-----------------------------------------|-----------------------------------------|
| O(3) | 0.034(9)                                | 0.06(15)                                | 0.09(10)                                | 0.005(9)                                | -0.011(14)                              | 0.012(19)                               |

Space group *R*32, *a* = 10.2599(19) Å, *c* = 7.2060(2) Å, *R*<sub>w</sub>p = 6.35 %, *R*<sub>p</sub> = 4.49 %.

Note : The form of the anisotropic temperature factor is  $\exp[-2p^2(h^2a^{*2}U_{11} + k^2b^{*2}U_{22} + l^2c^{*2}U_{33} + 2hka^{*}b^{*}U_{11} + 2hla^{*}c^{*}U_{13} + 2klb^{*}c^{*}U_{23})]$

Table S5. Interatomic distance (Å), bond angles (°) for  $\text{RbMg}_{0.9}\text{H}_{0.2}(\text{PO}_3)_3 \cdot y\text{H}_2\text{O}$

| Temperature <i>T</i> / K                                  | 298          | 453          | 553          |
|-----------------------------------------------------------|--------------|--------------|--------------|
| Interatomic distance                                      | <i>l</i> / Å | <i>l</i> / Å | <i>l</i> / Å |
| Mg <sup>a</sup> – O(1) <sup>a</sup>                       | 2.012        | 2.049        | 2.056        |
| Rb <sup>a</sup> – O(1) <sup>a</sup>                       | 2.912        | 2.919        | 2.929        |
| P <sup>b</sup> – O(1) <sup>a</sup>                        | 1.441        | 1.442        | 1.443        |
| P <sup>b</sup> – O(2) <sup>a</sup>                        | 1.634        | 1.630        | 1.635        |
| O(1) <sup>a</sup> – H(1) <sup>a</sup>                     | 1.825        | 1.811        |              |
| O(1) <sup>c</sup> – H(1) <sup>d</sup>                     | 2.090        | 2.253        |              |
| O(1) <sup>a</sup> – H(2) <sup>e</sup>                     | 1.828        | 1.769        | 1.669        |
| O(1) <sup>a</sup> – H(2) <sup>f</sup>                     | 1.361        | 1.466        | 1.591        |
| O(1) <sup>a</sup> – H(3) <sup>f</sup>                     | 1.719        | 1.715        |              |
| O(3) <sup>a</sup> – H(1) <sup>#1</sup>                    | 0.817        | 1.026        |              |
| O(3) <sup>a</sup> – H(2) <sup>g</sup>                     | 1.343        | 1.258        | 1.376        |
| O(3) <sup>a</sup> – H(2) <sup>e</sup>                     | 1.604        | 1.429        | 1.429        |
| O(3) <sup>d</sup> – H(2) <sup>f</sup>                     | 1.910        | 1.972        | 1.839        |
| O(3) <sup>a</sup> – H(3) <sup>f</sup>                     | 1.232        | 1.242        |              |
| Bond angle                                                | $\phi$ / °   | $\phi$ / °   | $\phi$ / °   |
| O(1) <sup>a</sup> – P <sup>b</sup> – O(1) <sup>g</sup>    | 127.58       | 127.87       | 124.09       |
| O(2) <sup>a</sup> – P <sup>b</sup> – O(2) <sup>h</sup>    | 94.97        | 95.62        | 97.43        |
| O(1) <sup>g</sup> – P <sup>b</sup> – O(2) <sup>h</sup>    | 112.35       | 111.67       | 112.14       |
| O(1) <sup>a</sup> – P <sup>b</sup> – O(2) <sup>h</sup>    | 102.52       | 102.77       | 104.00       |
| H(1) <sup>a</sup> – O(1) <sup>a</sup> – H(2) <sup>f</sup> | 71.73        | 73.36        |              |
| H(1) <sup>a</sup> – O(1) <sup>a</sup> – H(2) <sup>e</sup> | 73.62        | 77.84        |              |
| H(1) <sup>d</sup> – O(1) <sup>g</sup> – H(3) <sup>i</sup> | 35.24        | 40.14        |              |
| H(1) <sup>a</sup> – O(1) <sup>a</sup> – H(3) <sup>f</sup> | 39.63        | 48.56        |              |
| H(2) <sup>e</sup> – O(1) <sup>a</sup> – H(2) <sup>f</sup> | 38.87        | 30.31        | 26.00        |
| H(2) <sup>f</sup> – O(1) <sup>a</sup> – H(3) <sup>f</sup> | 74.06        | 69.54        |              |
| H(2) <sup>e</sup> – O(1) <sup>a</sup> – H(3) <sup>f</sup> | 50.10        | 49.68        |              |
| H(1) <sup>a</sup> – O(3) <sup>a</sup> – H(2) <sup>f</sup> | 121.34       | 119.52       |              |
| H(1) <sup>a</sup> – O(3) <sup>a</sup> – H(2) <sup>e</sup> | 125.84       | 132.04       |              |
| H(1) <sup>a</sup> – O(3) <sup>a</sup> – H(3) <sup>f</sup> | 68.59        | 79.01        |              |
| H(2) <sup>e</sup> – O(3) <sup>a</sup> – H(2) <sup>f</sup> | 44.80        | 38.23        | 30.29        |
| H(2) <sup>f</sup> – O(3) <sup>a</sup> – H(3) <sup>f</sup> | 93.49        | 93.80        |              |
| H(2) <sup>e</sup> – O(3) <sup>a</sup> – H(3) <sup>f</sup> | 62.49        | 66.05        |              |
| H(2) <sup>f</sup> – O(3) <sup>d</sup> – H(3) <sup>i</sup> | 52.00        | 47.86        |              |

Symmetry codes: <sup>a</sup>x, y, z, <sup>b</sup>-y+1/3, x-y+2/3, z+2/3, <sup>c</sup>-y+2/3, -x+y+1/3, z+2/3, <sup>d</sup>-y+2/3, x-y+1/3, z+1/3, <sup>e</sup>x-y+2/3, -y+1/3, -z+1/3,

<sup>f</sup>-x+y, -x, z <sup>g</sup>-x+2/3, -x+y+1/3, -z+1/3, <sup>h</sup>-x+y+2/3, -x+1/3, z+1/3, <sup>i</sup>x+2/3, y+1/3, z+1/3
